# Supplementary material
Source: Springer Nature journal article supplement (https://www.springermedizin.de/resource/supplementary/12875_2013_901_MOESM1_ESM.pdf/9435364)
Supplement: MOESM1 [file 9435364]

# Background

Similar factors for all socio-economic groups

## Perceptions

Expectations

### Perceived benefit of consultation:

Medical evaluation; information from trusted source; advice on illness management/ symptom relief  
*Minus*

### Barriers to consulting

Wasting doctors' time; previous experience of consulting; time and effort involved.

### Perceived Parental efficacy:

Experience with other children  
Need for reassurance/ safer to consult

Threats

### Perceived child's susceptibility

Perceived illness severity (seriousness)

### Perception of threat from illness:

Illness severity – perception of symptom severity and duration  
Behavioural factors; not sleeping/eating  
Uncertainty/ failure of home management

## Action

### Cues to action (Triggers to consulting):

Social pressures/ sanctioning  
Illness information - internet searching; social networks; pharmacy; NHS Direct

**Consult primary care**  
(behaviour will reduce threat based on expectations)
